# Supplementary material for: Insights for the Captive Management of South China Tigers Based on a Large-Scale Genetic Survey
Source: MDPI journal article supplement (doi:10.3390/genes15040398), 2024-03-24
Supplement: s1 [file s1]

Supplementary material:

**Insights for the Captive Management of South China Tigers Basing  
on Large-Scale Genetic Survey**

**Supplementary figure legend:**

Figure S1: The K value of Bayesian Clustering Analyses through software STRUCTURE (Usepopinfo = 1), admixture model, and burn-in and replication values set at 50000 and 100000, respectively. The figure was based on all 320 captive South China tigers and the 108 voucher tigers (Luo et al. 2004 and 2008) as the reference tiger population data set. The figure showed K = 15 is the highest probability among choices of K.

Figure S2: The Pearson correlation between  $f_M$  and  $f_P$ .

Figure S3: The Pearson correlation between heterozygous loci ratio and  $f_P$ .

Figure S4: The Pearson correlation between heterozygous loci ratio and  $f_M$ .

Figure S5: The Pearson correlation between  $f_P$  and generation.

Figure S6: The Pearson correlation between  $f_M$  and generation.

Figure S7: The Pearson correlation between heterozygous loci ratio and generation.

Figure S8: The distribution of  $f_M$  among the institutes with more than 3 living pureblood SCTs. The differences among locations were not significant with  $P > 0.05$  (ANOVA test).

Figure S9: The Pearson correlation between heterozygosity and nucleotide diversity ( $\pi$ ) at genome level.

Figure S10: The Pearson correlation between heterozygosity and  $F_{ROH}$  at genome level.

Figure S11: The comparison of  $F_{ROH}$  for total ROH between hybridization in Meihua mountain and pureblood SCTs ( $P = 0.0026$ , ANOVA).

Figure S12: The comparison of  $F_{ROH}$  for different ROH length between hybridization in Meihua mountain and pureblood SCTs. (A) the ROH length  $< 0.1M$  ( $P = 0.0001205$ , ANOVA); (B)  $0.1M \leq$  the ROH length  $< 1M$  ( $P = 0.001006$ , ANOVA); (C)  $1M \leq$  the ROH length  $< 3M$  ( $P = 0.0001264$ , ANOVA); (D)  $3M \leq$  the ROH length  $< 5M$  ( $P = 0.09333$ , ANOVA); (E)  $5M \leq$  the ROH length  $< 10M$  ( $P = 0.6082$ , ANOVA); (F)  $10M \leq$  the ROH length ( $P = 0.0002751$ , ANOVA).

Figure S13 The principal component analysis of PC1 and PC2 following autosomal variants. South China tigers included SCT and Mei. SCT denoted the 23 pureblood SCTs and Mei denoted the hybridization SCTs in Meihua mountain. ptal: *P. t. altaica*, ptco: *P. t. corbetti*, ptja: *P. t. jacksoni*, ptsu: *P. t. sumatrae*, ptti: *P. t. tigris*.

**Supplementary table legend**

Table S1. The samples information in this study. (a separated file)

Table S2. Structure results basing on microsatellite. (a separated file)

Table S3. Re-sequencing data statistics in this study.

Table S4 the genomic heterozygosity and  $F_{ROH}$  in this study

Table S5 the  $F_{ROH}$  under different ROH length (a separated file)

Table S6. the detail about ADMIXTURE under genome level for the living six tiger subspecies. K is set from 4 to 10. (a separated file)

Table S7 Individual homozygote SNP counts per impact category.

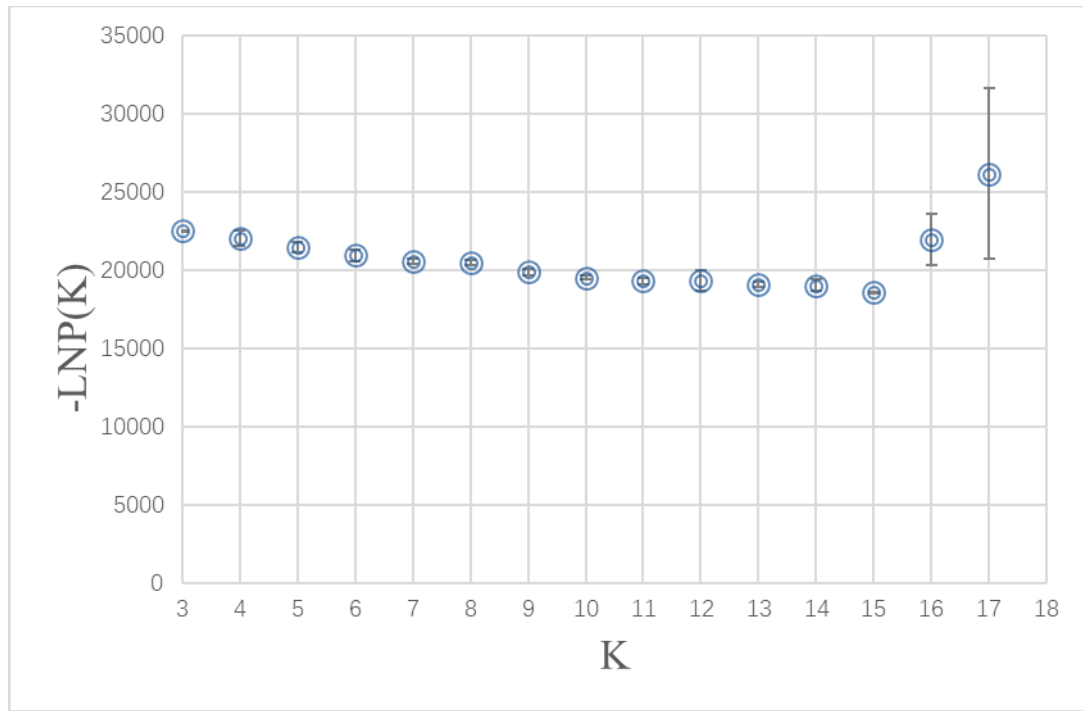

Figure S1: The K value of Bayesian Clustering Analyses through software STRUCTURE (Usepopinfo = 1), admixture model, and burn-in and replication values set at 50000 and 100000, respectively. The figure was based on all 320 captive South China tigers and the 108 voucher tigers (Luo et al. 2004 and 2008) as the reference tiger population data set. The figure showed K = 15 is the highest probability among choices of K.

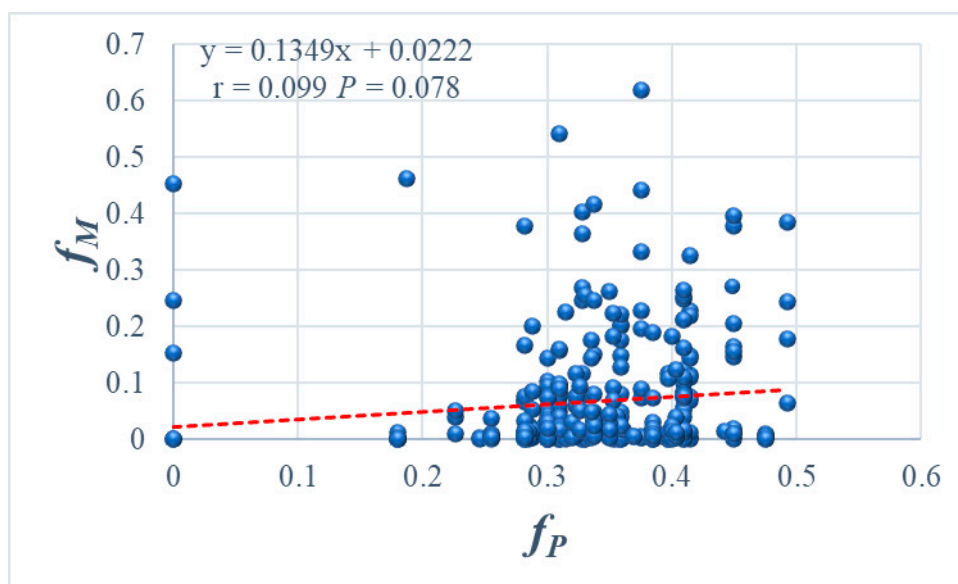

Figure S2: The Pearson correlation between  $f_M$  and  $f_P$ .

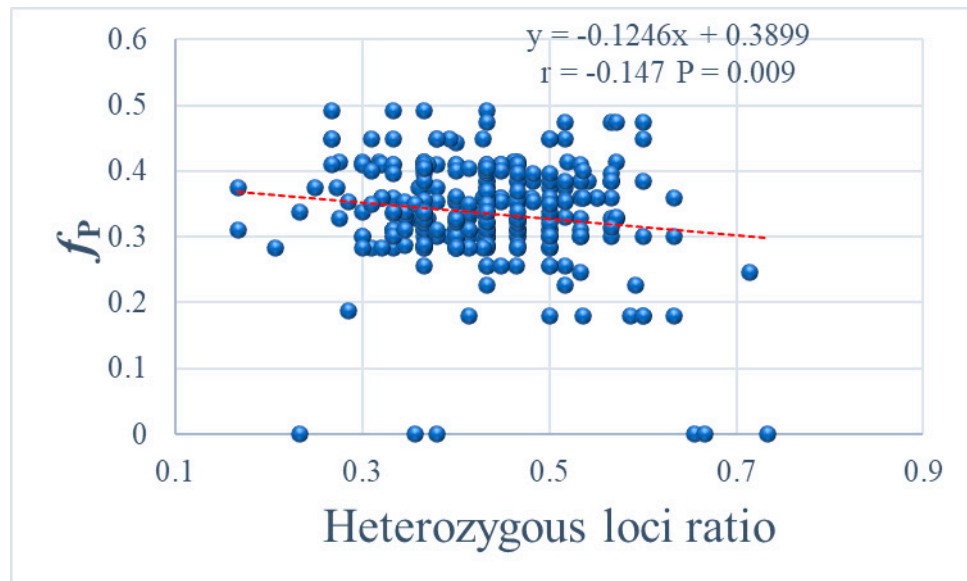

Figure S3: The Pearson correlation between heterozygous loci ratio and  $f_P$ .

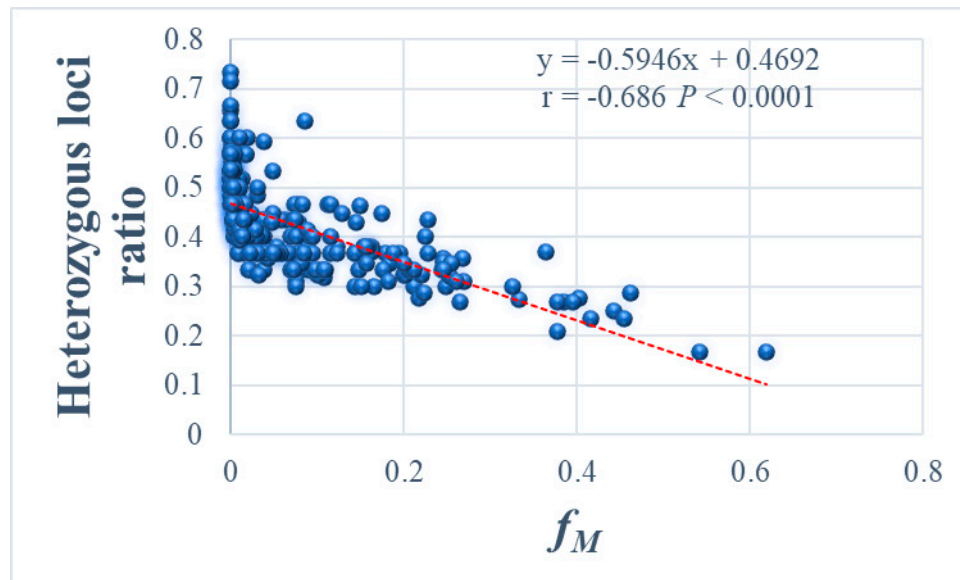

Figure S4: The Pearson correlation between heterozygous loci ratio and  $f_M$ .

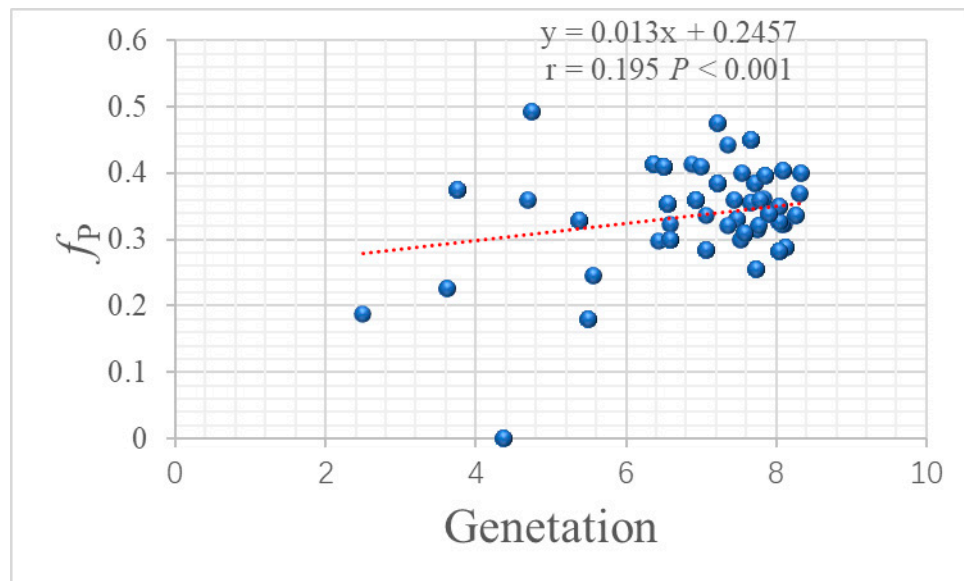

Figure S5: The Pearson correlation between  $f_P$  and generation.

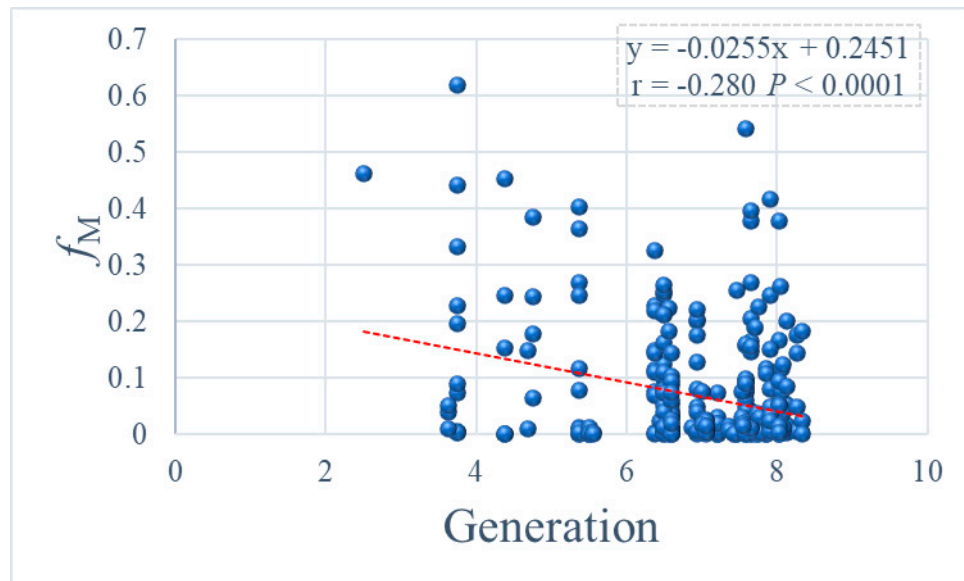

Figure S6: The Pearson correlation between  $f_M$  and generation.



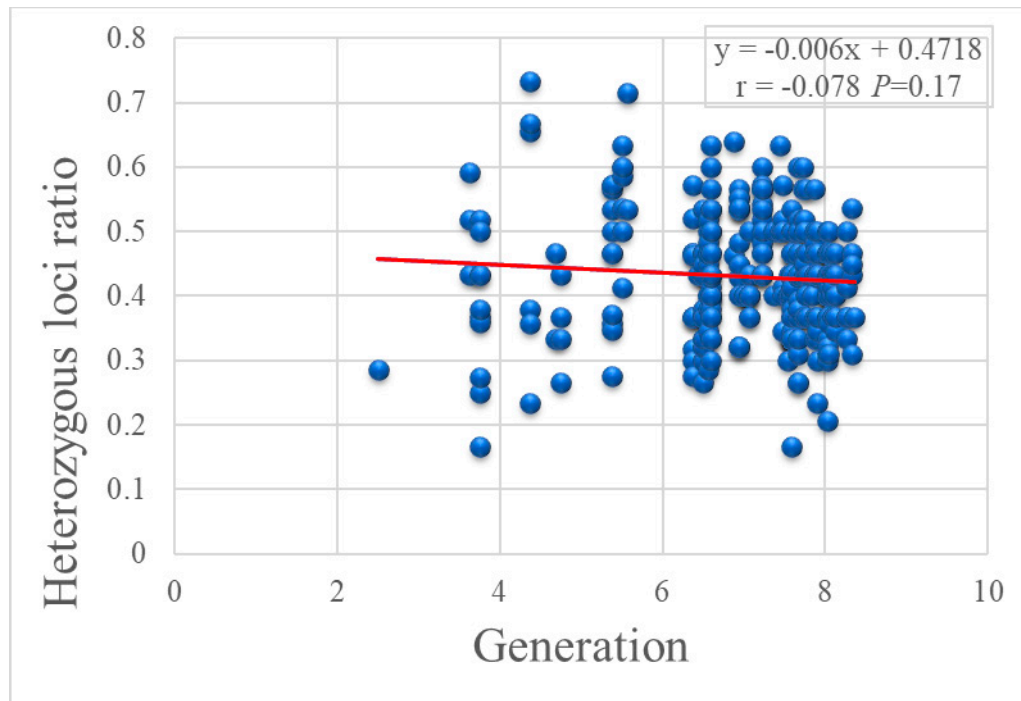

Figure S7: The Pearson correlation between heterozygous loci ratio and generation.

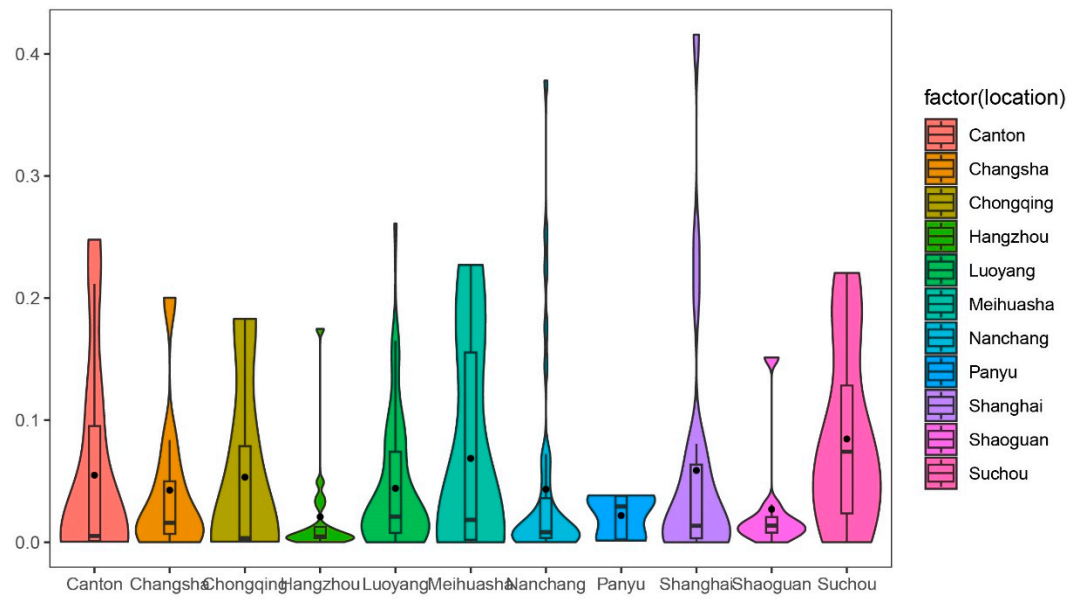

Figure S8: The distribution of  $f_M$  among the institutes with more than 3 living pureblood SCTs. The differences among locations were not significant with  $P > 0.05$  (ANOVA test).

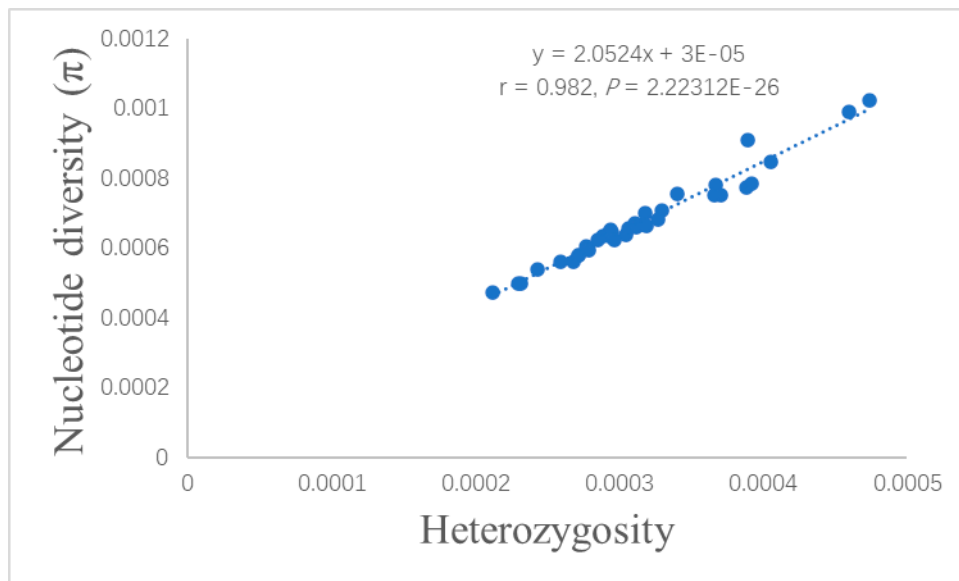

Figure S9: The Pearson correlation between heterozygosity and nucleotide diversity ( $\pi$ ) at genome level.

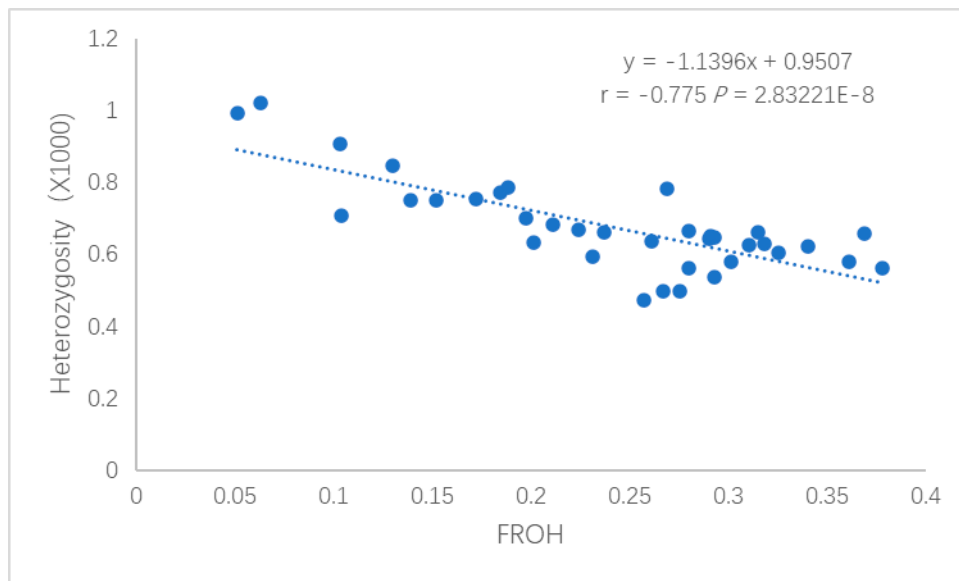

Figure S10: The Pearson correlation between heterozygosity and  $F_{ROH}$  at genome level.

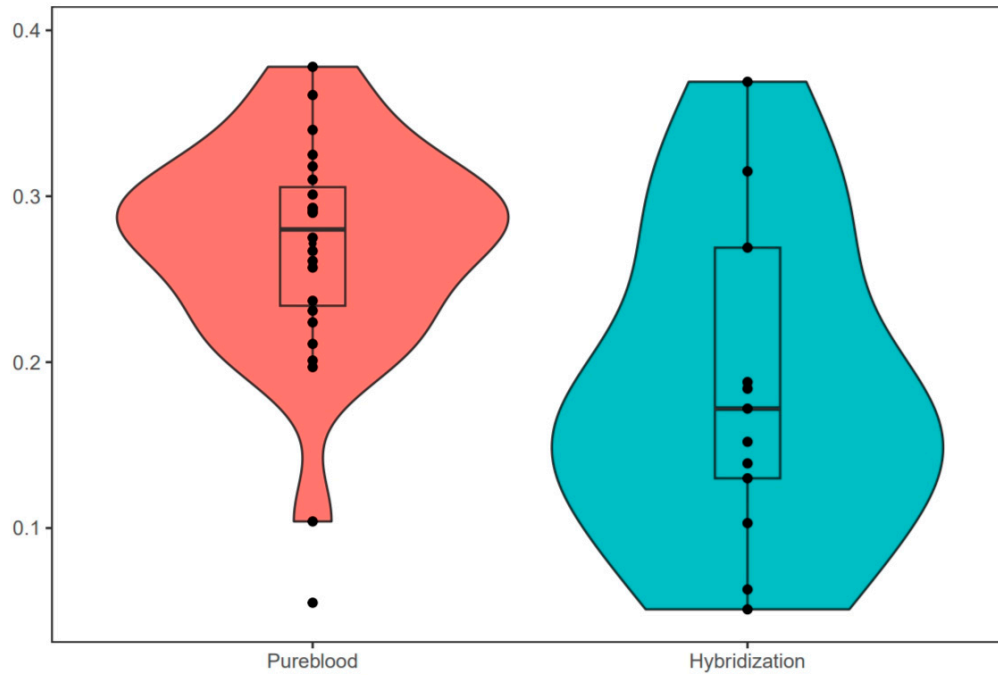

Figure S11: The comparison of  $F_{\text{ROH}}$  for total ROH between hybridization in Meihua mountain and pureblood SCTs ( $P = 0.0026$ , ANOVA).

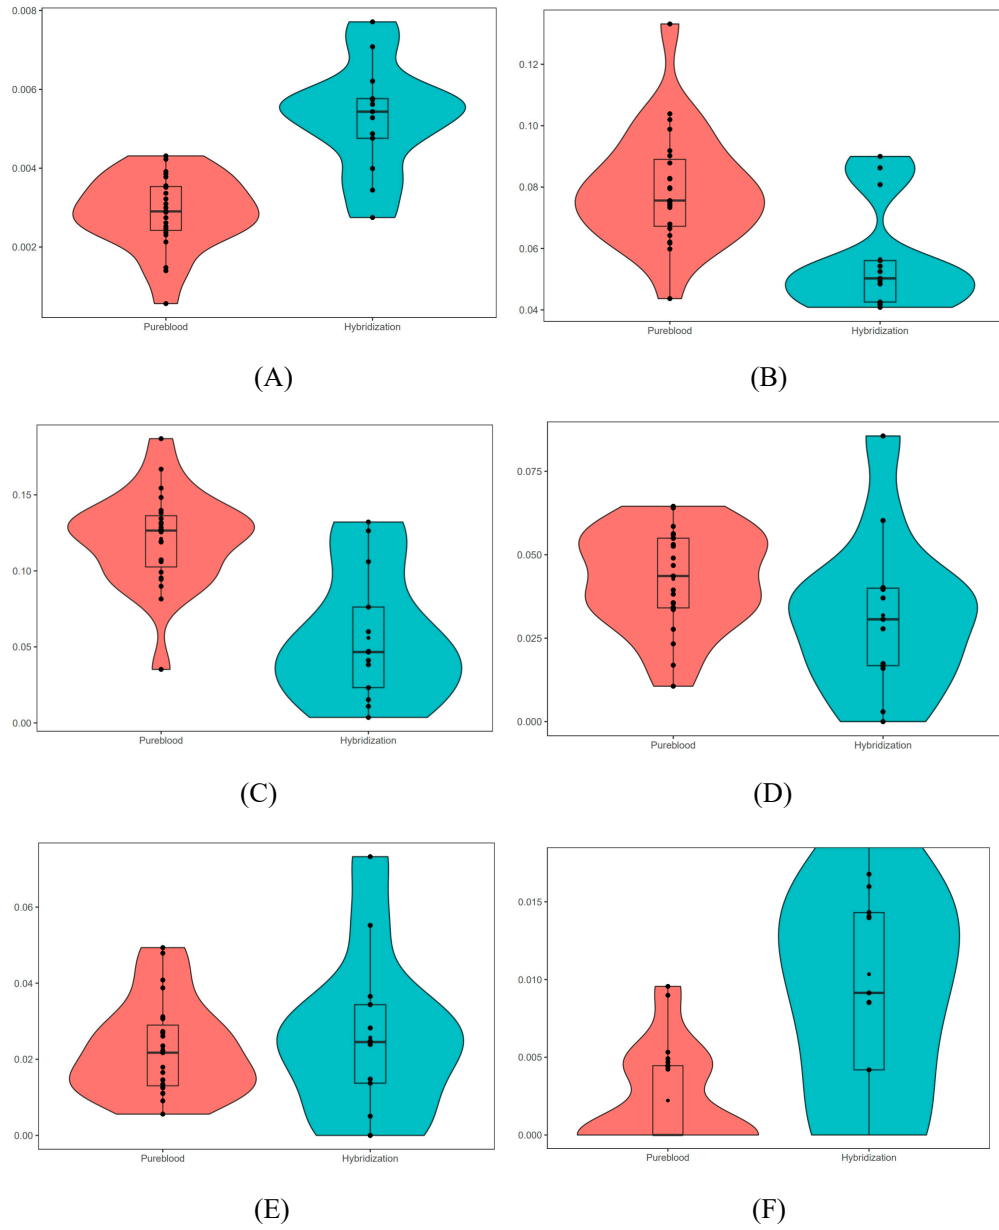

Figure S12: The comparison of  $F_{ROH}$  for different ROH length between hybridization in Meihua mountain and pureblood SCTs. (A) the ROH length  $< 0.1M$  ( $P = 0.0001205$ , ANOVA); (B)  $0.1M \leq$  the ROH length  $< 1M$  ( $P = 0.001006$ , ANOVA); (C)  $1M \leq$  the ROH length  $< 3M$  ( $P = 0.0001264$ , ANOVA); (D)  $3M \leq$  the ROH length  $< 5M$  ( $P = 0.09333$ , ANOVA); (E)  $5M \leq$  the ROH length  $< 10M$  ( $P = 0.6082$ , ANOVA); (F)  $10M \leq$  the ROH length ( $P = 0.0002751$ , ANOVA).

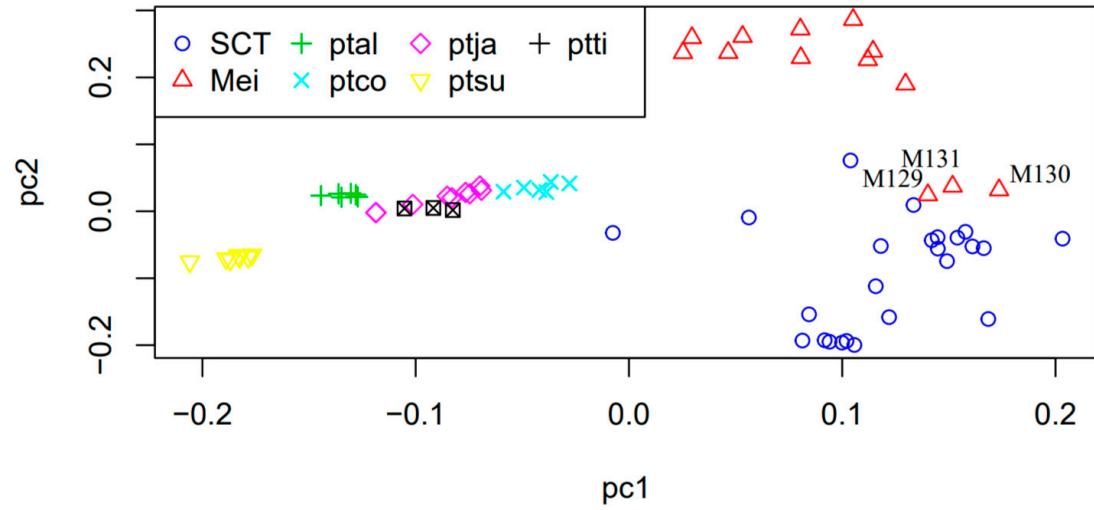

Figure S13 The principal component analysis of PC1 and PC2 following autosomal variants. South China tigers included SCT and Mei. SCT denoted the 23 pureblood SCTs and Mei denoted the hybridization SCTs in Meihua mountain. ptal: *P. t. altaica*, ptco: *P. t. corbetti*, ptja: *P. t. jacksoni*, ptsu: *P. t. sumatrae*, ptti: *P. t. tigris*.

Table S1. The samples information in this study. (a separated file)

Table S2. Structure results basing on microsatellite. (a separated file)

Table S3. Re-sequencing data statistics in this study.

| Sample | Read_length(bp) | RawBases(Gb) | RawCoverage(X) | CleanBases(Gb) | CleanCoverage(X) |
|--------|-----------------|--------------|----------------|----------------|------------------|
| #267   | 150_150         | 49.90826     | 20.8           | 47.94401278    | 19.98            |
| #296   | 150_150         | 44.61216     | 18.59          | 43.0103104     | 17.92            |
| #299   | 150_150         | 39.07528     | 16.27          | 37.50236       | 15.62            |
| #348   | 150_150         | 37.65111     | 15.67          | 36.254522      | 15.1             |
| #393   | 150_150         | 38.72085     | 16.12          | 36.747563      | 15.29            |
| #441   | 150_150         | 46.13822     | 19.21          | 43.827861      | 18.25            |
| #457   | 150_150         | 34.10595     | 14.2           | 32.957172      | 13.73            |
| #467   | 150_150         | 37.90963     | 15.78          | 36.580036      | 15.23            |
| #468   | 150_150         | 44.13163     | 18.38          | 41.101204      | 17.11            |
| #489   | 150_150         | 44.93985     | 18.71          | 42.607143      | 17.73            |
| #522   | 150_150         | 40.3453      | 16.8           | 38.747885      | 16.13            |
| #530   | 150_150         | 41.69762     | 17.36          | 39.582499      | 16.47            |
| #531   | 150_150         | 41.50857     | 17.27          | 39.477911      | 16.43            |
| #544   | 150_150         | 34.67444     | 14.43          | 33.165348      | 13.81            |
| #551   | 150_150         | 47.24652     | 19.67          | 44.92909       | 18.71            |
| #553   | 150_150         | 46.49082     | 19.36          | 44.311691      | 18.45            |
| #558   | 150_150         | 48.53714     | 20.2           | 46.351285      | 19.3             |
| #616   | 150_150         | 41.2668      | 17.18          | 39.281961      | 16.35            |
| #625   | 150_150         | 44.37436     | 18.47          | 42.410637      | 17.66            |
| #635   | 150_150         | 35.00888     | 14.57          | 33.61567       | 14               |
| #701   | 150_150         | 42.69144     | 17.77          | 40.710288      | 16.95            |
| #702   | 150_150         | 43.09487     | 17.94          | 41.207888      | 17.15            |
| #712   | 150_150         | 32.83035     | 13.67          | 31.538613      | 13.13            |
| M118   | 150_150         | 44.48234     | 18.53          | 43.886367      | 18.27            |
| M129   | 150_150         | 47.38267     | 19.74          | 39.466503      | 16.43            |
| M130   | 150_150         | 43.25693     | 18.02          | 40.379301      | 16.81            |
| M131   | 150_150         | 51.26582     | 21.36          | 42.877485      | 17.85            |
| M29    | 150_150         | 45.30731     | 18.88          | 43.819113      | 18.24            |
| M31    | 150_150         | 48.864211    | 20.36          | 46.599321      | 19.4             |
| M36    | 150_150         | 43.080932    | 17.95          | 41.194761      | 17.15            |
| M44    | 150_150         | 45.5760134   | 18.99          | 43.428646      | 18.08            |
| M64    | 150_150         | 45.192257    | 18.83          | 43.236483      | 18               |
| M67    | 150_150         | 40.968016    | 17.07          | 39.393241      | 16.4             |
| M70    | 150_150         | 46.93199     | 19.56          | 44.768306      | 18.65            |



|     |         |          |       |           |       |
|-----|---------|----------|-------|-----------|-------|
| M74 | 150_150 | 52.45002 | 21.85 | 50.145154 | 20.89 |
| M77 | 150_150 | 43.17973 | 17.99 | 41.141724 | 17.14 |

**Table S4** the genomic heterozygosity and  $F_{ROH}$  in this study

| Individual | Total ROH length (Kb) | the number of ROH | Average ROH length (Kb) | Number of heterozygotes | $F_{ROH}$ | non-ROH | Heterozygosity | N_SITES | Coverged(bp) | CoveredRatio(%) | Origin    |
|------------|-----------------------|-------------------|-------------------------|-------------------------|-----------|---------|----------------|---------|--------------|-----------------|-----------|
| #267       | 693753                | 739               | 938.772                 | 1539512                 | 0.29      | 0.71    | 0.000643078    | 2376436 | 2393974405   | 99.1            | pureblood |
| #296       | 905833                | 895               | 1012.1                  | 1342943                 | 0.378     | 0.62    | 0.00056107     | 2367254 | 2393537867   | 99.08           | pureblood |
| #299       | 478368                | 613               | 780.372                 | 1504520                 | 0.201     | 0.79    | 0.000633491    | 2009701 | 2374965919   | 98.31           | pureblood |
| #441       | 856086                | 961               | 890.828                 | 1373068                 | 0.361     | 0.63    | 0.000578736    | 2257874 | 2372530894   | 98.21           | pureblood |
| #530       | 694938                | 816               | 851.639                 | 1533596                 | 0.293     | 0.70    | 0.000646195    | 2415206 | 2373270732   | 98.24           | pureblood |
| #551       | 807383                | 999               | 808.191                 | 1480910                 | 0.34      | 0.66    | 0.000623663    | 2444966 | 2374537488   | 98.3            | pureblood |
| #616       | 619749                | 726               | 853.648                 | 1516877                 | 0.261     | 0.73    | 0.000638408    | 2189493 | 2376028907   | 98.36           | pureblood |
| #701       | 530718                | 717               | 740.193                 | 1589963                 | 0.224     | 0.77    | 0.000669779    | 2259842 | 2373861531   | 98.27           | pureblood |
| #702       | 563601                | 739               | 762.654                 | 1575202                 | 0.237     | 0.76    | 0.000663101    | 2249524 | 2375507455   | 98.34           | pureblood |
| #348       | 246572                | 448               | 550.383                 | 1684277                 | 0.104     | 0.89    | 0.000708491    | 2069506 | 2377275259   | 98.41           | pureblood |
| #393       | 664980                | 768               | 865.85                  | 1584009                 | 0.28      | 0.72    | 0.000666514    | 237556  | 2376556699   | 98.38           | pureblood |

|          |        |          |                 |             |               |           |                 |                 |                |       |                       |
|----------|--------|----------|-----------------|-------------|---------------|-----------|-----------------|-----------------|----------------|-------|-----------------------|
|          |        |          | 9               |             |               |           |                 | 3               |                |       |                       |
| #45<br>7 | 610577 | 52<br>0  | 117<br>4.1<br>9 | 11189<br>68 | 0.<br>25<br>7 | 0.74<br>3 | 0.0004<br>71408 | 151<br>881<br>2 | 23736<br>72443 | 98.26 | pureb<br>lood         |
| #46<br>7 | 652237 | 68<br>6  | 950<br>.78<br>3 | 11845<br>68 | 0.<br>27<br>5 | 0.72<br>5 | 0.0004<br>98584 | 170<br>198<br>2 | 23758<br>62752 | 98.35 | pureb<br>lood         |
| #46<br>8 | 632885 | 62<br>1  | 101<br>9.1<br>4 | 11833<br>72 | 0.<br>26<br>7 | 0.73<br>3 | 0.0004<br>98352 | 167<br>294<br>0 | 23745<br>70114 | 98.3  | pureb<br>lood         |
| #48<br>9 | 772474 | 84<br>5  | 914<br>.17      | 14350<br>47 | 0.<br>32<br>5 | 0.67<br>5 | 0.0006<br>04443 | 232<br>842<br>9 | 23741<br>62803 | 98.28 | pureb<br>lood         |
| #52<br>2 | 467853 | 82<br>4  | 567<br>.78<br>3 | 16615<br>72 | 0.<br>19<br>7 | 0.80<br>3 | 0.0006<br>99608 | 227<br>725<br>8 | 23750<br>03370 | 98.32 | pureb<br>lood         |
| #53<br>1 | 755879 | 92<br>9  | 813<br>.64<br>8 | 14963<br>92 | 0.<br>31<br>8 | 0.68<br>2 | 0.0006<br>30478 | 241<br>395<br>9 | 23734<br>24450 | 98.25 | pureb<br>lood         |
| #54<br>4 | 695086 | 82<br>3  | 844<br>.57<br>6 | 12786<br>00 | 0.<br>29<br>3 | 0.70<br>7 | 0.0005<br>3857  | 192<br>981<br>0 | 23740<br>64437 | 98.28 | pureb<br>lood         |
| #55<br>3 | 691404 | 94<br>8  | 729<br>.33      | 15493<br>46 | 0.<br>29<br>1 | 0.70<br>9 | 0.0006<br>52548 | 242<br>402<br>4 | 23743<br>00162 | 98.29 | pureb<br>lood         |
| #55<br>8 | 715804 | 83<br>8  | 854<br>.18<br>1 | 13773<br>23 | 0.<br>30<br>1 | 0.69<br>9 | 0.0005<br>79561 | 210<br>154<br>9 | 23764<br>93772 | 98.38 | pureb<br>lood         |
| #62<br>5 | 500523 | 66<br>7  | 750<br>.40<br>9 | 16231<br>29 | 0.<br>21<br>1 | 0.78<br>9 | 0.0006<br>82882 | 225<br>205<br>8 | 23768<br>81704 | 98.39 | pureb<br>lood         |
| #63<br>5 | 735365 | 11<br>85 | 620<br>.56<br>1 | 14845<br>02 | 0.<br>31      | 0.69      | 0.0006<br>24977 | 235<br>242<br>0 | 23752<br>89131 | 98.33 | pureb<br>lood         |
| #71<br>2 | 548027 | 62<br>0  | 883<br>.91<br>5 | 14100<br>43 | 0.<br>23<br>1 | 0.76<br>9 | 0.0005<br>93776 | 193<br>997<br>3 | 23747<br>03827 | 98.3  | pureb<br>lood         |
| M2<br>9  | 151309 | 72<br>9  | 207<br>.55<br>7 | 24505<br>24 | 0.<br>06<br>3 | 0.93<br>7 | 0.0010<br>23128 | 328<br>850<br>7 | 23951<br>29796 | 99.15 | hybri<br>dizati<br>on |
| M3<br>1  | 120311 | 66<br>1  | 182<br>.01<br>3 | 23557<br>04 | 0.<br>05<br>1 | 0.94<br>9 | 0.0009<br>91829 | 309<br>188<br>2 | 23751<br>11375 | 98.32 | hybri<br>dizati<br>on |
| M3       | 223962 | 72       | 309             | 19832       | 0.            | 0.89      | 0.0009          | 283             | 21835          | 90.39 | hybri                 |

|          |        |          |                 |             |               |           |                 |                 |                |       |                       |
|----------|--------|----------|-----------------|-------------|---------------|-----------|-----------------|-----------------|----------------|-------|-----------------------|
| 6        |        | 3        | .76<br>8        | 93          | 10<br>3       | 7         | 0829            | 522<br>4        | 46758          |       | dizati<br>on          |
| M4<br>4  | 310632 | 64<br>8  | 479<br>.37      | 20298<br>31 | 0.<br>13      | 0.87      | 0.0008<br>46703 | 281<br>273<br>0 | 23973<br>35770 | 99.24 | hybri<br>dizati<br>on |
| M6<br>4  | 440750 | 66<br>5  | 662<br>.78<br>2 | 18551<br>34 | 0.<br>18<br>4 | 0.81<br>6 | 0.0007<br>73832 | 264<br>670<br>3 | 23973<br>35770 | 99.24 | hybri<br>dizati<br>on |
| M6<br>7  | 451466 | 76<br>0  | 594<br>.03<br>4 | 18838<br>45 | 0.<br>18<br>8 | 0.81<br>2 | 0.0007<br>85333 | 276<br>613<br>7 | 23987<br>85187 | 99.3  | hybri<br>dizati<br>on |
| M7<br>0  | 644717 | 96<br>0  | 671<br>.58      | 18728<br>65 | 0.<br>26<br>9 | 0.73<br>1 | 0.0007<br>81398 | 291<br>968<br>3 | 23968<br>12652 | 99.22 | hybri<br>dizati<br>on |
| M7<br>4  | 754580 | 94<br>7  | 796<br>.81<br>1 | 15825<br>20 | 0.<br>31<br>5 | 0.68<br>5 | 0.0006<br>60159 | 263<br>490<br>8 | 23971<br>80527 | 99.23 | hybri<br>dizati<br>on |
| M7<br>7  | 883849 | 10<br>13 | 872<br>.50<br>7 | 15738<br>54 | 0.<br>36<br>9 | 0.63<br>1 | 0.0006<br>56754 | 276<br>227<br>1 | 23964<br>13501 | 99.2  | hybri<br>dizati<br>on |
| M11<br>8 | 634363 | 73<br>6  | 861<br>.90<br>6 | 12725<br>69 | 0.<br>28      | 0.72      | 0.0005<br>61193 | 219<br>572<br>8 | 22676<br>12945 | 93.87 | hybri<br>dizati<br>on |
| M1<br>29 | 362488 | 57<br>0  | 635<br>.94<br>4 | 17864<br>77 | 0.<br>15<br>2 | 0.84<br>8 | 0.0007<br>50562 | 243<br>086<br>1 | 23801<br>84335 | 98.53 | hybri<br>dizati<br>on |
| M1<br>30 | 332556 | 49<br>7  | 669<br>.12<br>7 | 18033<br>46 | 0.<br>13<br>9 | 0.86<br>1 | 0.0007<br>52305 | 238<br>258<br>5 | 23970<br>94200 | 99.23 | hybri<br>dizati<br>on |
| M1<br>31 | 412917 | 63<br>0  | 655<br>.42<br>4 | 18134<br>23 | 0.<br>17<br>2 | 0.82<br>8 | 0.0007<br>56204 | 253<br>428<br>5 | 23980<br>60478 | 99.27 | hybri<br>dizati<br>on |

**Table S5** the  $F_{\text{ROH}}$  under different ROH length (a separated file)

Table S6. the detail about ADMIXTURE under genome level for the living six tiger subspecies. K is set from 4 to 10. (a separated file)

Table S7  
homozygote  
impact category.

| Individual | High | Moderate | Low  | Total |
|------------|------|----------|------|-------|
| M129       | 10   | 625      | 989  | 1624  |
| M130       | 6    | 520      | 951  | 1477  |
| M131       | 11   | 752      | 1032 | 1795  |

Individual  
SNP counts per
